# Supplementary material for: MRI safety—developing the right culture
Source: Springer Nature journal article supplement (doi:10.1007/s00247-025-06179-5), 2025-02-14
Supplement: MOESM1 [file 247_2025_6179_MOESM1_ESM.pdf]

# OUTPATIENT MAGNETIC RESONANCE IMAGING (MRI) PROCEDURE SCREENING

**This form is to be completed by a patient/parent/patient representative.**

Prior to the patient having an MRI, he/she will need to be checked for metallic items on or within the body. Even something as simple as lotion with glitter can cause the patient harm. We care about the safety of the patient and need you to take a few minutes of your time to complete this form.

- Has the patient experienced any problem related to a previous MRI?  
If yes, please describe: \_\_\_\_\_  
☐ Yes ☐ No ☐ Unknown  
☐ First MRI
- Has the patient had an injury to the eye involving a metallic object or fragment (e.g., metallic slivers, shavings, foreign body, etc.)?  
If yes, please describe: \_\_\_\_\_  
☐ Yes ☐ No ☐ Unknown
- Has the patient ever been injured by a metallic object or foreign body (e.g., BB, bullet, shrapnel, etc.)?  
If yes, please describe: \_\_\_\_\_  
☐ Yes ☐ No ☐ Unknown
- Does the patient have anemia or any disease(s) that affects his/her blood, a history of renal (kidney) disease, or seizures?  
If yes, please describe: \_\_\_\_\_  
☐ Yes ☐ No ☐ Unknown

**For menstruating female patients:**

- Date of last menstrual period: \_\_\_\_/\_\_\_\_/\_\_\_\_  
☐ Yes ☐ No ☐ Unknown

**\*Please indicate if the patient has any of the following:**

- |                                                   |                                                                                           |
|---------------------------------------------------|-------------------------------------------------------------------------------------------|
| Aneurysm clip(s)                                  | <input type="checkbox"/> Yes <input type="checkbox"/> No <input type="checkbox"/> Unknown |
| Cardiac pacemaker                                 | <input type="checkbox"/> Yes <input type="checkbox"/> No <input type="checkbox"/> Unknown |
| Implanted cardioverter defibrillator (ICD)        | <input type="checkbox"/> Yes <input type="checkbox"/> No <input type="checkbox"/> Unknown |
| Any Cardiac stent/ pulmonary coils                | <input type="checkbox"/> Yes <input type="checkbox"/> No <input type="checkbox"/> Unknown |
| Electronic implant or device                      | <input type="checkbox"/> Yes <input type="checkbox"/> No <input type="checkbox"/> Unknown |
| Magnetically-activated implant or device          | <input type="checkbox"/> Yes <input type="checkbox"/> No <input type="checkbox"/> Unknown |
| Neurostimulation system                           | <input type="checkbox"/> Yes <input type="checkbox"/> No <input type="checkbox"/> Unknown |
| Any type of prosthesis (eye, penile, etc.)        | <input type="checkbox"/> Yes <input type="checkbox"/> No <input type="checkbox"/> Unknown |
| External electrodes                               | <input type="checkbox"/> Yes <input type="checkbox"/> No <input type="checkbox"/> Unknown |
| Heart valve prosthesis                            | <input type="checkbox"/> Yes <input type="checkbox"/> No <input type="checkbox"/> Unknown |
| Eyelid spring or wire                             | <input type="checkbox"/> Yes <input type="checkbox"/> No <input type="checkbox"/> Unknown |
| Artificial or prosthetic limb                     | <input type="checkbox"/> Yes <input type="checkbox"/> No <input type="checkbox"/> Unknown |
| Metallic stent, filter, or coil                   | <input type="checkbox"/> Yes <input type="checkbox"/> No <input type="checkbox"/> Unknown |
| Shunt (spinal or intraventricular)                | <input type="checkbox"/> Yes <input type="checkbox"/> No <input type="checkbox"/> Unknown |
| Vascular access port and/or catheter              | <input type="checkbox"/> Yes <input type="checkbox"/> No <input type="checkbox"/> Unknown |
| Radiation seeds or implants                       | <input type="checkbox"/> Yes <input type="checkbox"/> No <input type="checkbox"/> Unknown |
| Swan-Ganz or thermodilation catheter              | <input type="checkbox"/> Yes <input type="checkbox"/> No <input type="checkbox"/> Unknown |
| Medication patch (Nicotine, Nitroglycerine, etc.) | <input type="checkbox"/> Yes <input type="checkbox"/> No <input type="checkbox"/> Unknown |
| Any metallic fragment or foreign object           | <input type="checkbox"/> Yes <input type="checkbox"/> No <input type="checkbox"/> Unknown |
| Wire mesh implant                                 | <input type="checkbox"/> Yes <input type="checkbox"/> No <input type="checkbox"/> Unknown |
| Tissue expander (e.g., breast)                    | <input type="checkbox"/> Yes <input type="checkbox"/> No <input type="checkbox"/> Unknown |
| Surgical staples, clips, or metallic sutures      | <input type="checkbox"/> Yes <input type="checkbox"/> No <input type="checkbox"/> Unknown |
| Joint replacement (hip, knee, etc.)               | <input type="checkbox"/> Yes <input type="checkbox"/> No <input type="checkbox"/> Unknown |
| Bone/joint pin, screw, nail, wire, plate, etc.    | <input type="checkbox"/> Yes <input type="checkbox"/> No <input type="checkbox"/> Unknown |
| Dentures or partial plates                        | <input type="checkbox"/> Yes <input type="checkbox"/> No <input type="checkbox"/> Unknown |
| Tattoo or permanent makeup                        | <input type="checkbox"/> Yes <input type="checkbox"/> No <input type="checkbox"/> Unknown |
| Body piercing jewelry                             | <input type="checkbox"/> Yes <input type="checkbox"/> No <input type="checkbox"/> Unknown |
| Hearing aids                                      | <input type="checkbox"/> Yes <input type="checkbox"/> No <input type="checkbox"/> Unknown |
| Temperature probe (rectal, esophageal)            | <input type="checkbox"/> Yes <input type="checkbox"/> No <input type="checkbox"/> Unknown |
| Temperature sensing Foley catheter                | <input type="checkbox"/> Yes <input type="checkbox"/> No <input type="checkbox"/> Unknown |
| Breathing problem or motion disorder              | <input type="checkbox"/> Yes <input type="checkbox"/> No <input type="checkbox"/> Unknown |
| Claustrophobia                                    | <input type="checkbox"/> Yes <input type="checkbox"/> No <input type="checkbox"/> Unknown |
| Braces or any orthodontic implants                | <input type="checkbox"/> Yes <input type="checkbox"/> No <input type="checkbox"/> Unknown |

- |                                                               |                                                                                           |
|---------------------------------------------------------------|-------------------------------------------------------------------------------------------|
| Spinal cord stimulator                                        | <input type="checkbox"/> Yes <input type="checkbox"/> No <input type="checkbox"/> Unknown |
| Internal electrodes or wires                                  | <input type="checkbox"/> Yes <input type="checkbox"/> No <input type="checkbox"/> Unknown |
| Bone growth/bone fusion stimulator                            | <input type="checkbox"/> Yes <input type="checkbox"/> No <input type="checkbox"/> Unknown |
| Cochlear, otologic, or other ear implants including ear tubes | <input type="checkbox"/> Yes <input type="checkbox"/> No <input type="checkbox"/> Unknown |
| Insulin or other infusion pump                                | <input type="checkbox"/> Yes <input type="checkbox"/> No <input type="checkbox"/> Unknown |
| Implanted drug infusion device                                | <input type="checkbox"/> Yes <input type="checkbox"/> No <input type="checkbox"/> Unknown |
| Tracheostomy                                                  | <input type="checkbox"/> Yes <input type="checkbox"/> No <input type="checkbox"/> Unknown |
| Other implant _____                                           | <input type="checkbox"/> Yes <input type="checkbox"/> No <input type="checkbox"/> Unknown |

**Please mark on the figure(s) below the location of any implant or metal inside of or on the patient's body.**

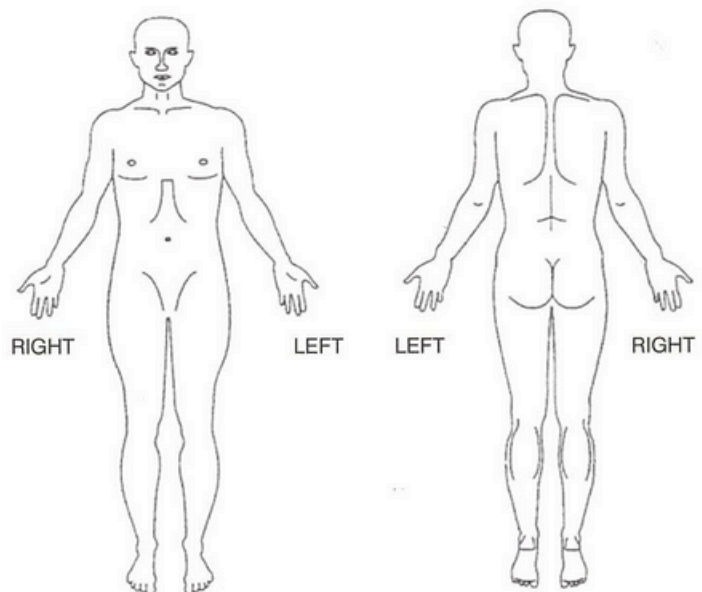

# OUTPATIENT MAGNETIC RESONANCE IMAGING (MRI) PROCEDURE SCREENING

**\*If the answer to any of the questions on page 1 is "yes", please provide the make, model and serial number of any devices. Also provide date device was placed and surgical notes if available. If this information is unknown, write in "Notes" section.**

| Device Model | Date Placed | Serial #<br>(If known) | Notes |
|--------------|-------------|------------------------|-------|
|              |             |                        |       |
|              |             |                        |       |
|              |             |                        |       |
|              |             |                        |       |

The above information and information on page 1 is correct to the best of my knowledge.

Signature of Person Completing Form: \_\_\_\_\_ Relationship to Patient: \_\_\_\_\_

Printed Name: \_\_\_\_\_ Date: \_\_\_\_\_ Time: \_\_\_\_\_

**The following information is completed by MRI staff**

- |                                                               |                              |                             |
|---------------------------------------------------------------|------------------------------|-----------------------------|
| Allergies/Adverse Reactions reviewed in EHR                   | <input type="checkbox"/> Yes | <input type="checkbox"/> No |
| Pregnant                                                      | <input type="checkbox"/> Yes | <input type="checkbox"/> No |
| IUD, diaphragm, or pessary                                    | <input type="checkbox"/> Yes | <input type="checkbox"/> No |
| Clothes                                                       | <input type="checkbox"/> Yes | <input type="checkbox"/> No |
| Procedure explained                                           | <input type="checkbox"/> Yes | <input type="checkbox"/> No |
| Acoustic noise - use of ear plugs or other hearing protection | <input type="checkbox"/> Yes | <input type="checkbox"/> No |
| Active Infection/Isolation precautions reviewed in EHR        | <input type="checkbox"/> Yes | <input type="checkbox"/> No |

\_\_\_\_\_  
MRI Staff Signature

\_\_\_\_\_  
Printed Name

\_\_\_\_\_  
Date

\_\_\_\_\_  
Time

Signature of MRI Staff who reviewed and followed-up on information including "unknown" responses, "yes" responses, and "MRI staff only" information on page 2.

Form/Information Reviewed in Radiology by:

\_\_\_\_\_  
Signature

\_\_\_\_\_  
Printed Name

\_\_\_\_\_  
and/or Contact Number

\_\_\_\_\_  
Date

\_\_\_\_\_  
Time

☐ MRI Technologist

☐ Nurse

☐ Radiologist

☐ Other: \_\_\_\_\_
